# Supplementary material
Source: PubMed Central journal article supplement (PMC2935944)
Supplement: NIHMS230647-supplement-1_si_001.pdf [file NIHMS230647-supplement-1_si_001.pdf]

**SUPPORTING INFORMATION**  
**Experimental Evidence for Heavy-Atom Tunneling in the Ring-Opening of  
 Cyclopropylcarbinyl Radical from Intramolecular <sup>12</sup>C/<sup>13</sup>C Kinetic Isotope Effects**

Ollie M. Gonzalez-James, Xue Zhang, Ayan Datta, David A. Hrovat, Weston Thatcher Borden\* and Daniel A. Singleton\*

*Department of Chemistry, Texas A&M University, College Station, Texas 77842 and Department of Chemistry and Center for Advanced Scientific Computing and Modeling, University of North Texas, 1155 Union Circle #305070, Denton, TX 76203-5017*

singleton@mail.chem.tamu.edu

**Table of Contents**

|                                                        |   |
|--------------------------------------------------------|---|
| A. Experimental Procedures.....                        | 1 |
| B. Technical Comments.....                             | 3 |
| C. Computational Procedures.....                       | 3 |
| D. Gaussrate Calculated Rates.....                     | 6 |
| E. References, and Complete References 11 and 12 ..... | 7 |

## A. Experimental Procedures.

**General.** Oven-dried or flame-dried glassware was cooled under a stream of nitrogen prior to use, and standard syringe-and-septa techniques were employed in all cases. The reaction apparatus was a 100 mL three-necked round-bottomed flask equipped with an internal thermometer and a Vigreux column connected to a distillation apparatus and Schlenk receiver flask (cooled in a -42 °C bath during the distillation). The system was purged with nitrogen prior to use.

**Formation and distillation of 1-butene from the ring-opening of cyclopropylcarbinyl radical,**

**Example Procedure.** To 5 mL (44 mmol) of 1,2-dichlorobenzene at 22 °C was added 0.97 mL (1.35 g, 10 mmol) of (bromomethyl)cyclopropane by syringe. While stirring the solution, 0.2 mL (0.14 g, 1.4 mmol) of triethylborane was added dropwise to the reaction mixture. Using a syringe pump, 3.25 mL (3.52 g, 12 mmol) of tributyltin hydride was added to the solution over a 1-h period. In order to initiate the reaction, 60 mL of air was bubbled into the solution using a syringe pump over a 1-h period. Until the reaction was complete, the addition of several air bubbles at once led to an increase in the internal reaction temperature, and this temperature change was used to judge whether the reaction was complete. In addition, 0.5 mL aliquots of the reaction mixture were analyzed directly by <sup>1</sup>H NMR (applicable only to reactions at or above ambient temperature). The reactions at 22 °C were judged to be complete after the 1-h period. The reaction mixture was then distilled to afford the 1-butene. Deuterated chloroform (approximately 0.5 mL) was then added to the 1-butene and the resulting mixture was sealed in an NMR tube.

Closely analogous processes and reagent amounts were employed in procedures at 80 °C, 0 °C, -78 °C and -100 °C and in replicate procedures. For reactions performed at -78 °C and -100 °C, 5 mL (39 mmol) of methylcyclohexane was used as the solvent in place of the 1,2-dichlorobenzene that was used in the higher temperature reactions. Longer reaction times (2-3 h) were employed for the reactions at -78 °C and -100 °C.

**NMR Measurements.** All NMR samples were prepared in 5 mm NMR tubes filled to a constant height of 5 cm with CDCl<sub>3</sub>. The <sup>13</sup>C spectra were recorded at 125.81 MHz using inverse gated decoupling, 160 s delays between calibrated π/2 pulses, and a 5 s acquisition time to collect 347 224 points. Integrations were numerically determined using a constant integration region for each peak that was a constant

multiple of the peak widths at half height. A zero-order baseline correction was generally applied, but to avoid any qualitative manipulation no first-order or higher-order baseline correction is ever applied. Six spectra were recorded for each sample. The complete results from the NMR measurements and the details of the calculation of the  $^{13}\text{C}$  ratios and KIEs are given in the next section.

**NMR Integration Results.** All integrations are relative integrations of C3 versus an integration of 1000 for C4. A complication in the numerical interpretation of these integrations is that C4 is subject to one  $^1J^{13}\text{C}-^{13}\text{C}$  coupling with satellites not included in the integration range, while C3 is subject to two such satellite couplings. To allow for this, the integrations at C3 were adjusted by the 0.0107(8) natural abundance of  $^{13}\text{C}$  (*Si*). The 95% confidence ranges were calculated in a standard way. (See: [http://www.iupac.org/publications/analytical\\_compendium/Cha02sec3.pdf](http://www.iupac.org/publications/analytical_compendium/Cha02sec3.pdf).)

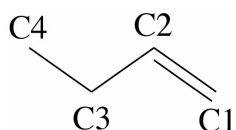

#### Integrations for 80 °C

|         |         |           |         |              |         |
|---------|---------|-----------|---------|--------------|---------|
| 1047.42 | 1048.24 | 1047.53   | 1044.53 | 1051.33      | 1045.65 |
| 1055.43 | 1052.93 | 1055.96   | 1052.63 | 1056.07      | 1054.88 |
|         |         | AVE       |         | KIE          |         |
|         |         | 1051.05   |         | <b>1.062</b> |         |
|         |         | Corrected |         | 95%          |         |
|         |         | 1062.296  |         | Confidence   |         |
|         |         |           |         | <b>0.003</b> |         |

#### Integrations for 22 °C

|        |         |           |         |              |         |
|--------|---------|-----------|---------|--------------|---------|
| 1075   | 1067.68 | 1060.93   | 1064.25 | 1067.98      | 1065.11 |
| 1069.9 | 1066.61 | 1068.6    | 1069.85 | 1066.12      | 1066.99 |
|        |         | AVE       |         | KIE          |         |
|        |         | 1067.418  |         | <b>1.079</b> |         |
|        |         | Corrected |         | 95%          |         |
|        |         | 1078.84   |         | Confidence   |         |
|        |         |           |         | <b>0.002</b> |         |

#### Integrations for 0 °C

|         |         |           |         |              |         |
|---------|---------|-----------|---------|--------------|---------|
| 1075.16 | 1071.96 | 1072.3    | 1073.46 | 1064.93      | 1067.01 |
| 1068.85 | 1083.04 | 1073.49   | 1076.76 | 1079.98      | 1076.32 |
|         |         | AVE       |         | KIE          |         |
|         |         | 1073.605  |         | <b>1.085</b> |         |
|         |         | Corrected |         | 95%          |         |
|         |         | 1085.093  |         | Confidence   |         |
|         |         |           |         | <b>0.003</b> |         |

**Integrations for -78 °C**

|         |         |         |         |         |         |
|---------|---------|---------|---------|---------|---------|
| 1120.3  | 1118.94 | 1117.41 | 1119.76 | 1119.3  | 1121.94 |
| 1115.68 | 1121.18 | 1118.49 | 1118.42 | 1111.12 | 1111.7  |
| 1124.06 | 1117.04 | 1122.54 | 1119.06 | 1123.65 | 1124.63 |

|           |              |
|-----------|--------------|
| AVE       | KIE          |
| 1119.179  | <b>1.131</b> |
| Corrected | 95%          |
| 1131.154  | Confidence   |
|           | <b>0.002</b> |

**Integrations for -100 °C**

|         |         |         |         |         |         |
|---------|---------|---------|---------|---------|---------|
| 1146.83 | 1150.08 | 1156.91 | 1152.91 | 1150.61 | 1147.89 |
|---------|---------|---------|---------|---------|---------|

|           |              |
|-----------|--------------|
| AVE       | KIE          |
| 1150.872  | <b>1.163</b> |
| Corrected | 95%          |
| 1163.186  | Confidence   |
|           | <b>0.004</b> |

**B. Technical Comments**

**Notes on the irreversibility of the ring-opening of cyclopropylcarbinyl radical.** The experimental rate constant of the reversible process ( $k_r$ ) is  $4.9 \times 10^3 \text{ s}^{-1}$  at 25 °C (*Sii*). The competing rate constant of the hydrogen abstraction from the tributyltin hydride ( $k_H$ ) is known to be  $2.4 \times 10^6 \text{ M}^{-1} \text{ s}^{-1}$  at 25 °C from the literature (*Siii*). Although the tributyltin hydride is added slowly as a precaution, the oxygen-initiation of the reaction occurred with the tributyltin hydride concentration at 1.3 M, making the pseudo-first order rate constant of  $k_H$   $3.1 \times 10^6 \text{ s}^{-1}$  at 25 °C, 1000 times faster than  $k_r$ .

If there were any significant reversibility of the ring opening, then the isotope effect observed would start to reflect the step transferring a hydrogen from the tin hydride to the butenyl radical. The predicted carbon isotope effect for this step at 25 °C is 1.032. Because the observed isotope effects are much higher, and agree with predictions for the ring-opening step but not the hydrogen transfer step, this weighs against significant reversibility in the reaction.

**C. Computational Procedures**

Gaussrate Input File (.dat)

END

\*General

ATOMS

TITLE  
methylcyclopropyl ring opening  
calculation of the CVT and SCT  
Information about stationary points included in the  
fu5 input file

|   |   |
|---|---|
| 1 | C |
| 2 | C |
| 3 | C |
| 4 | C |
| 5 | H |
| 6 | H |
| 7 | H |

```

8      H      6      5.07134811  -1.15619095  -0.03795250
9      H      7      1.14922776  -1.70200656  2.33259882
10     H      8      -5.27242608  -0.17187123  0.05658396
11     H      9      -3.03245808  -2.28899271  -1.63726142
END      10     -1.71105599  2.20229613  1.88369163
      11     -0.83380500  2.41681447  -1.31034403
NOSUPERMOL
      END

INPUNIT AU      ELEC
      2 0.0
      END

*OPTIMIZATION      SPECIES NONLINRP

OPTMIN OHOOK
OPTTS OHOOK

*SECOND      *START

HESSCAL HHOOK      STATUS 2

*REACT1      # Geometry in a.u.
      GEOM
      1      2.98068545  0.00030090  -0.31999608
      2      0.51335696  -0.00013717  0.90396442
      3      -1.73107474  -1.41326461  -0.26397892
      4      -1.73108002  1.41319687  -0.26323248
      5      3.13468301  0.00180321  -2.36639373
      6      4.71080531  -0.00228637  0.77591847
      7      0.55410135  -0.00079480  2.95937608
      8      -2.99673029  -2.40331464  1.01569070
      9      -1.39258524  -2.38818004  -2.03943899
      10     -2.99676175  2.40227971  1.01719114
      11     -1.39319307  2.38934998  -2.03813886
      END

# Geometry in a.u.
      GEOM
      1      3.05242727  -0.08674629  -0.20729437
      2      0.72976208  0.06206769  0.98778592
      3      -1.55063561  1.36837263  -0.05359849
      4      -2.19557927  -1.28867257  -0.66394324
      5      3.35785936  0.74399342  -2.06060182
      6      4.60205034  -1.14990654  0.61280673
      7      0.56175666  -0.64528634  2.90904986
      8      -3.30968004  -2.43071196  0.62000218
      9      -1.71198495  -2.07648107  -2.48868394
      10     -2.75514567  2.31226156  1.32974745
      11     -1.17319733  2.59099997  -1.67185311
      END

ELEC
      2 0.0
      END

SPECIES NONLINTS

# end of start section

*PATH

SCALEMASS 1.00

RODS
INTMU 3
SSTEP 0.001
INH 10

SRANGE
SLP 1.25
SLM -1.25
END

RPM pagem

```

SIGN REACTANT

IDIRECT 1

COORD curv3

INTDEF

2-4 1-2-4 2-4-3 1-2-4-3 4-2-3  
 2-1 3-2 4-3 5-1 6-1 7-2 8-4  
 9-4 10-3 11-3 3-2-1 4-3-2 5-1-2 6-1-2  
 7-2-3 8-4-3 9-4-3 10-3-2 11-3-2 4-3-2-1 5-1-2-3  
 6-1-2-3 7-2-3-4 8-4-3-2 9-4-3-2 10-3-2-1 11-3-2-1  
 END

PRPATH

COORD 2 4  
 INTERVAL 1  
 XMOL  
 END

EXFIRST

EXPROD  
 EXNSTEP 200  
 EXSTEP 0.005  
 END

EXSECOND

EXREACT  
 EXNSTEP 200  
 EXSTEP 0.005  
 END

SPECSTOP

CURVE vag  
 POINT savegrid  
 PERCENTDOWN 95.  
 END

\*TUNNEL

QUAD

NQE 30  
 NQTH 30  
 END

SCT

\*RATE

FORWARDK

SIGMAF 1  
CVT

TEMP

100.  
 102.  
 104.  
 110.  
 120.  
 123.  
 125.  
 127.  
 130.  
 140.  
 148.  
 150.  
 152.  
 160.  
 170.  
 173.  
 175.  
 177.  
 180.  
 190.  
 200.  
 202.  
 210.  
 220.  
 223.  
 225.  
 227.  
 230.  
 240.  
 248.  
 250.  
 252.  
 260.  
 270.  
 280.  
 290.  
 296.  
 298.  
 300.  
 END

## D. Gaussrate Calculated Rates.

Calculated rates for the ring-opening of cyclopropylcarbinyl radical **1** to the 3-butenyl radical **2**. Rates of a  $^{13}\text{C}$  at position C3 and C4 are shown for CVT and CVT+SCT at temperatures ranging from 100 to 353 K.

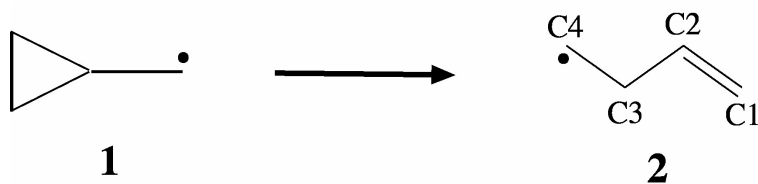

| Temp<br>(K) | CVT                   |                       | CVT+SCT               |                       |
|-------------|-----------------------|-----------------------|-----------------------|-----------------------|
|             | $^{13}\text{C}$ at C3 | $^{13}\text{C}$ at C4 | $^{13}\text{C}$ at C3 | $^{13}\text{C}$ at C4 |
| 100         | 3.9876E-05            | 3.3235E-05            | 1.4196E-01            | 2.3170E-01            |
| 102         | 8.5898E-05            | 7.1861E-05            | 1.7097E-01            | 2.7719E-01            |
| 104         | 1.7968E-04            | 1.5086E-04            | 2.0867E-01            | 3.3552E-01            |
| 110         | 1.4008E-03            | 1.1879E-03            | 4.0959E-01            | 6.3709E-01            |
| 120         | 2.7257E-02            | 2.3450E-02            | 1.5511E+00            | 2.2473E+00            |
| 123         | 6.0465E-02            | 5.2221E-02            | 2.3917E+00            | 3.3913E+00            |
| 125         | 1.0069E-01            | 8.7180E-02            | 3.2077E+00            | 4.4857E+00            |
| 127         | 1.6503E-01            | 1.4322E-01            | 4.3131E+00            | 5.9516E+00            |
| 130         | 3.3656E-01            | 2.9310E-01            | 6.7423E+00            | 9.1302E+00            |
| 140         | 2.9066E+00            | 2.5579E+00            | 2.9575E+01            | 3.8016E+01            |
| 148         | 1.3236E+01            | 1.1734E+01            | 9.2117E+01            | 1.1478E+02            |
| 150         | 1.8856E+01            | 1.6745E+01            | 1.2124E+02            | 1.5007E+02            |
| 152         | 2.6613E+01            | 2.3674E+01            | 1.5893E+02            | 1.9550E+02            |
| 170         | 4.1155E+02            | 3.7098E+02            | 1.4991E+03            | 1.7676E+03            |
| 173         | 7.9733E+02            | 7.2103E+02            | 2.6315E+03            | 3.0761E+03            |
| 180         | 1.4894E+03            | 1.3509E+03            | 4.5055E+03            | 5.2263E+03            |
| 195         | 8.0210E+03            | 7.3347E+03            | 1.9696E+04            | 2.2419E+04            |
| 200         | 1.3298E+04            | 1.2190E+04            | 3.0876E+04            | 3.4960E+04            |
| 202         | 1.6166E+04            | 1.4833E+04            | 3.6759E+04            | 4.1539E+04            |
| 210         | 3.4028E+04            | 3.1333E+04            | 7.1709E+04            | 8.0446E+04            |
| 220         | 8.0011E+04            | 7.3977E+04            | 1.5553E+05            | 1.7310E+05            |
| 223         | 1.0189E+05            | 9.4311E+04            | 1.9382E+05            | 2.1525E+05            |
| 225         | 1.1928E+05            | 1.1049E+05            | 2.2378E+05            | 2.4818E+05            |
| 227         | 1.3925E+05            | 1.2909E+05            | 2.5779E+05            | 2.8550E+05            |
| 230         | 1.7479E+05            | 1.6221E+05            | 3.1739E+05            | 3.5083E+05            |
| 240         | 3.5802E+05            | 3.3339E+05            | 6.1345E+05            | 6.7398E+05            |
| 248         | 6.0977E+05            | 5.6926E+05            | 1.0033E+06            | 1.0975E+06            |
| 250         | 6.9294E+05            | 6.4730E+05            | 1.1295E+06            | 1.2343E+06            |
| 252         | 7.8588E+05            | 7.3455E+05            | 1.2693E+06            | 1.3857E+06            |
| 260         | 1.2756E+06            | 1.1950E+06            | 1.9909E+06            | 2.1656E+06            |
| 273         | 2.6399E+06            | 2.4816E+06            | 3.9261E+06            | 4.2468E+06            |
| 280         | 3.7993E+06            | 3.5774E+06            | 5.5226E+06            | 5.9576E+06            |
| 290         | 6.2020E+06            | 5.8532E+06            | 8.7535E+06            | 9.4093E+06            |
| 296         | 8.1928E+06            | 7.7420E+06            | 1.1379E+07            | 1.2207E+07            |
| 298         | 8.9674E+06            | 8.4775E+06            | 1.2391E+07            | 1.3285E+07            |
| 300         | 9.8036E+06            | 9.2718E+06            | 1.3479E+07            | 1.4442E+07            |
| 353         | 7.2446E+07            | 6.9137E+07            | 9.0104E+07            | 9.5231E+07            |

## E. References, and Complete References 12 and 13

**Complete Reference 11.** J. C. Corchado, Y.-Y. Chuang, P. L. Fast, W.-P. Hu, Y.-P. Liu, G. C. Lynch, K. A. Nguyen, C. F. Jackels, A. Fernandez Ramos, B. A. Ellingson, B. J. Lynch, J. Zheng, V. S. Melissas, J. Villà, I. Rossi, E. L. Coitiño, J. Pu, T. V. Albu, R. Steckler, B. C. Garrett, A. D. Isaacson, and D. G. Truhlar, POLYRATE–version 9.7, University of Minnesota, Minneapolis, 2007.

**Complete Reference 12.** Gaussian 03, Revision E.01, M. J. Frisch, G. W. Trucks, H. B. Schlegel, G. E. Scuseria, M. A. Robb, J. R. Cheeseman, J. A. Montgomery, Jr., T. Vreven, K. N. Kudin, J. C. Burant, J. M. Millam, S. S. Iyengar, J. Tomasi, V. Barone, B. Mennucci, M. Cossi, G. Scalmani, N. Rega, G. A. Petersson, H. Nakatsuji, M. Hada, M. Ehara, K. Toyota, R. Fukuda, J. Hasegawa, M. Ishida, T. Nakajima, Y. Honda, O. Kitao, H. Nakai, M. Klene, X. Li, J. E. Knox, H. P. Hratchian, J. B. Cross, V. Bakken, C. Adamo, J. Jaramillo, R. Gomperts, R. E. Stratmann, O. Yazyev, A. J. Austin, R. Cammi, C. Pomelli, J. W. Ochterski, P. Y. Ayala, K. Morokuma, G. A. Voth, P. Salvador, J. J. Dannenberg, V. G. Zakrzewski, S. Dapprich, A. D. Daniels, M. C. Strain, O. Farkas, D. K. Malick, A. D. Rabuck, K. Raghavachari, J. B. Foresman, J. V. Ortiz, Q. Cui, A. G. Baboul, S. Clifford, J. Cioslowski, B. B. Stefanov, G. Liu, A. Liashenko, P. Piskorz, I. Komaromi, R. L. Martin, D. J. Fox, T. Keith, M. A. Al-Laham, C. Y. Peng, A. Nanayakkara, M. Challacombe, P. M. W. Gill, B. Johnson, W. Chen, M. W. Wong, C. Gonzalez, and J. A. Pople, Gaussian, Inc., Wallingford CT, 2004.

---

Si De Laeter, J. R.; Böhlke, J. K.; De Bièvre, P.; Hidaka, H. Peiser, H. S.; Rosman, K. J. R.; Taylor, P. D. P. *Pure Appl. Chem.* **2000**, *75*, 683-800.

Sii Griller, D.; Ingold, K. U. *Arc. Chem. Res.* **1980**, *13*, 317.

Siii Johnston, L. J.; Luszyk, J.; Wayner, D. D. M.; Abeywickreyma, A. N.; Beckwith, A. L. J.; Scaiano, J. C.; Ingold, K. U. *J. Am. Chem. Soc.* **1985**, *107*, 4594-4596.
